# Supplementary material for: Discovery of a novel third-generation EGFR inhibitor and identification of a potential combination strategy to overcome resistance
Source: PubMed Central journal article supplement (PMC7218543; doi:10.1186/s12943-020-01202-9), 2020-05-13
Supplement: 12943_2020_1202_MOESM1_ESM.pdf [file 12943_2020_1202_MOESM1_ESM.pdf]

## Supplementary Figure 1

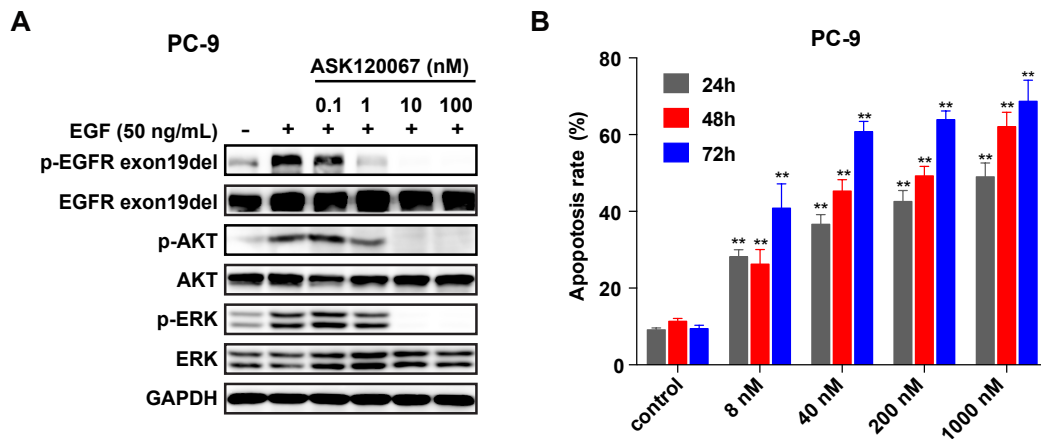

**Fig. S1.** ASK120067 treatment inhibits activation of EGFR and downstream signaling and induces apoptosis in PC-9 cells. **a** ASK120067 inhibited the phosphorylation of EGFR-Tyr1068 and its downstream signaling proteins AKT and ERK in PC-9 cells. **b** Apoptosis rate of PC-9 cells was evaluated by flow cytometry after treatment with increasing concentrations of ASK120067 for 24 to 72 h. Data are presented as the mean  $\pm$  SEM, and the significance of differences was determined by Student's *t* test (\* $p$  < 0.05, \*\* $p$  < 0.01).

## Supplementary Figure 2

A

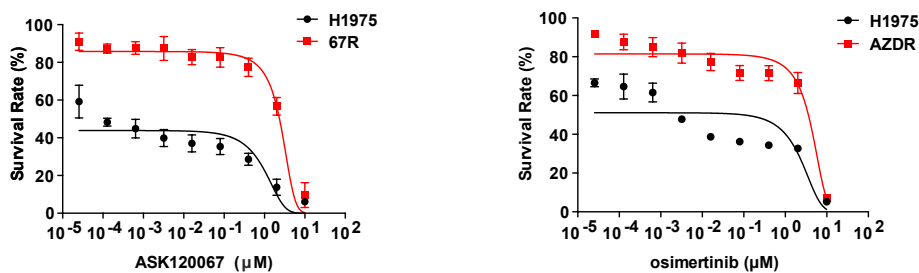

B

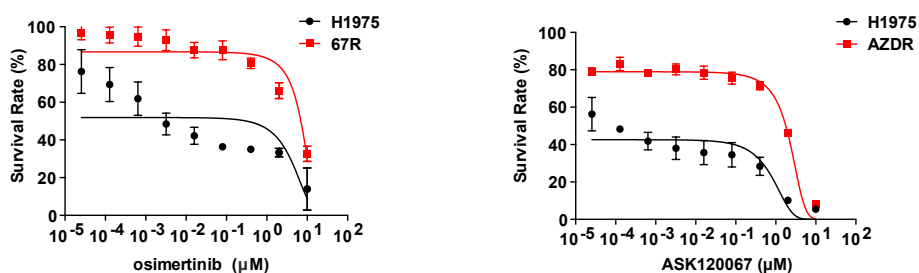

C

| Cells | EGFR codon 790              |                             | EGFR codon 858              |                             |
|-------|-----------------------------|-----------------------------|-----------------------------|-----------------------------|
|       | Numbers of reads indicate T | Numbers of reads indicate M | Numbers of reads indicate L | Numbers of reads indicate R |
| H1975 | 12                          | 52 (81.25%)                 | 25                          | 66 (72.53%)                 |
| 67R   | 24                          | 51 (68.00%)                 | 33                          | 57 (63.33%)                 |
| AZDR  | 31                          | 65 (67.71%)                 | 42                          | 80 (65.57%)                 |

**Fig. S2** Characterization of ASK120067- or osimertinib resistant NCI-H1975 cell lines. **a** ASK120067-resistant cell populations (67R) or osimertinib-resistant cell populations (AZDR) and the parental NCI-H1975 cells were treated with the indicated concentrations of ASK120067 or osimertinib for 72 h. **b** 67R or AZDR and the parental NCI-H1975 cells were treated with the indicated concentrations of osimertinib or ASK120067 for 72 h. Viable cells were measured by the SRB assay and plotted relative to the untreated controls. **c** Mutation status of the 790 codon and 858 codon of EGFR in NCI-H1975, 67R and AZDR cells were tested by whole-exome sequencing (WES).

### Supplementary Figure 3

A

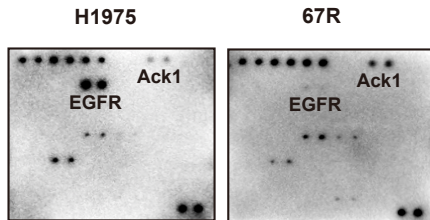

B

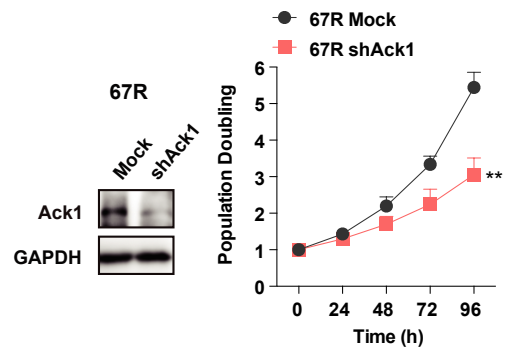

**Fig. S3** ASK120067-resistant NCI-H1975 cells exhibited high Ack1 phosphorylation levels and growth dependence on Ack1. **a** Phosphorylation levels of 71 kinases in parental NCI-H1975 cells and 67R cells were tested and compared using human tyrosine kinase phosphorylation array. **b** Growth curves of ASK120067-resistant NCI-H1975 cells after Ack1 knockdown were assessed by SRB assay. Data are shown as the mean  $\pm$  SEM, and the significance of differences was calculated by Student's *t* test ( $*p < 0.05$ ,  $**p < 0.01$ ).

**Supplementary Figure 4**

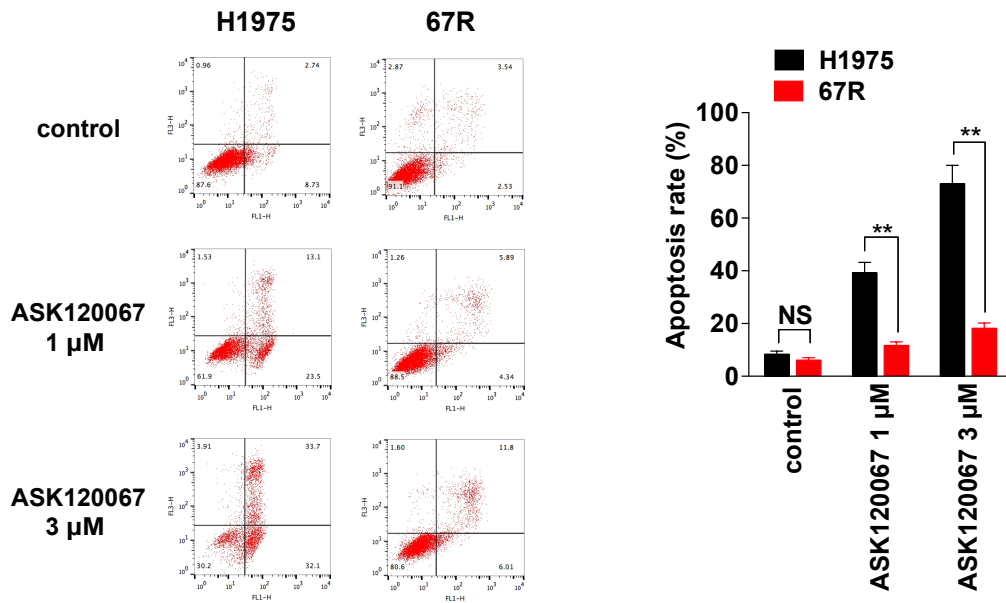

**Fig. S4** ASK120067-resistant cells exhibited apoptotic resistance to ASK120067 treatment. 67R and the parental NCI-H1975 cells were treated with ASK120067 for 48 h, and then apoptosis rates were evaluated by flow cytometry. Data are presented as the mean  $\pm$  SEM, and the significance of differences was determined by Student's *t* test (\* $p$  < 0.05, \*\* $p$  < 0.01).

### Supplementary Figure 5

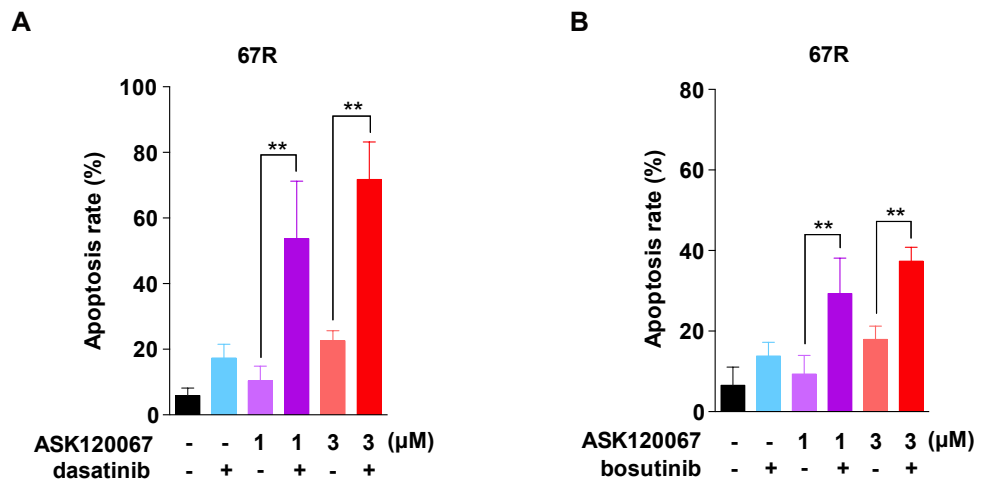

**Fig. S5** Combination of ASK120067 with either dasatinib (a) or bosutinib (b) partially restored the apoptosis-inducing activity of ASK120067-resistant cells to ASK120067 treatment. Data are plotted as the mean  $\pm$  SD, and the significance of differences was evaluated by Student's *t* test (\* $p < 0.05$ , \*\* $p < 0.01$ ).

### Supplementary Figure 6

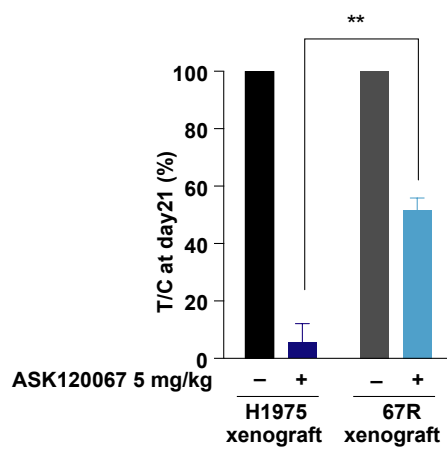

**Fig. S6** Comparison of the *in vivo* antitumor efficacy of ASK120067 in an NCI-H1975 xenograft model and ASK120067-resistant xenograft models. Data are plotted as the mean  $\pm$  SD, and the significance of differences was evaluated by Student's *t* test ( $*p < 0.05$ ,  $**p < 0.01$ ).
